# Supplementary material for: A stimuli-responsive l-DOPA-based supramolecular gel for the detection of fluoride ion
Source: Royal Society of Chemistry journal article supplement (doi:10.1039/d3nj05169b), 2024-01-01
Supplement: d3nj05169b1.pdf [file d3nj05169b1.pdf]

# Stimuli responsive L-DOPA based supramolecular gel for detection of fluoride ion

Dr. Subhra Kanti Mandal<sup>a</sup>, Dr. Piya Seth<sup>b</sup>, Dr. Tanmoy Kar<sup>c\*</sup>

## Electronic supplementary information (ESI)

<sup>a</sup> Department of Chemistry, P. R. Thakur Government College, Thakurnagar, North 24 Pgs., Pin-743287, West Bengal, India

<sup>b</sup> Department of Chemistry, Sister Nibedita Govt. General Degree College for Girls, Hastings House, Alipore, Kolkata, Pin-700027, West Bengal, India

<sup>c</sup>, \* Department of Chemistry, Vivekananda Mission Mahavidyalaya, Chaitanyapur, Purba Medinipur, West Bengal, India, Pin- 721645

\*Corresponding author.

E-mail address: [tanmoykar@vmmahavidyalaya.ac.in](mailto:tanmoykar@vmmahavidyalaya.ac.in) (Dr. Tanmoy Kar)

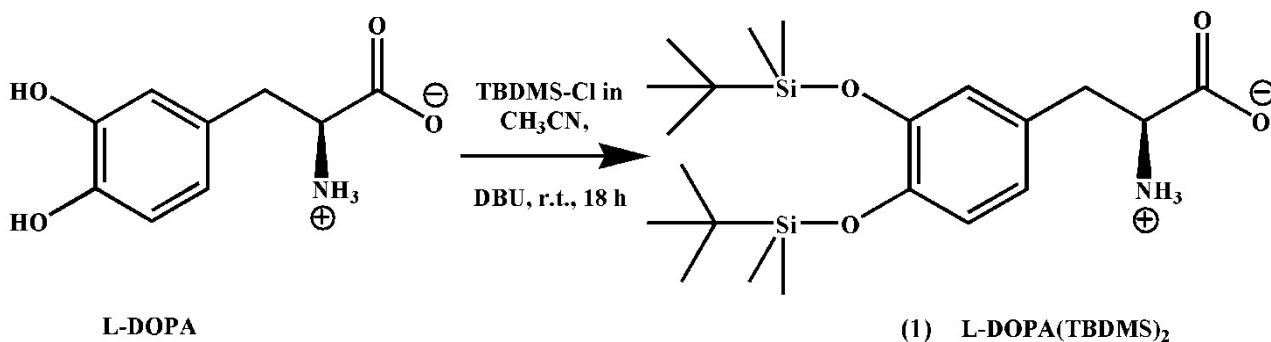

**Scheme S1** Synthetic scheme for gelator **1**

**Synthetic procedure of amphiphile 1 [3,4-Bis(*tert*-butyldimethylsilyloxy)-L-phenylalanine] i.e. [L-DOPA(TBDMS)<sub>2</sub>]:** 1.76 g (11.6 mmol) of *tert*-butyldimethylsilyl chloride (TBDMS-Cl) was taken in 10 ml of dry acetonitrile and 0.8 g (4 mmol) of L-DOPA was added to the solution. The suspension was stirred and cooled to 0°C, and 1.8 ml (12 mmol) of 1,8-diazabicyclo[5.4.0]undec-7-ene (DBU) was added to the suspension. Then the reaction mixture was stirred for 20 h at room temperature. A precipitate was obtained which was then filtered, dried at 50°C to yield L-DOPA(TBDMS)<sub>2</sub>. Yield of the final product was 40%. The crude product was recrystallized from methanol/acetonitrile to obtain pure **1**.

**Compound 1.** <sup>1</sup>H NMR (500 MHz, CD<sub>3</sub>OD, rt) δ = 6.82 (m, 1H, aromatic H), 6.79 (m, 2H, aromatic H), 3.73 (m, 1H, α-CH<sub>3</sub>), 2.91 (m, 2H, β-CH<sub>2</sub>), 1.08 (s, 18H, C(CH<sub>3</sub>)<sub>3</sub>), 0.06 (s, 12H, Si-CH<sub>3</sub>) MS (ESI): m/z calcd for C<sub>21</sub>H<sub>39</sub>NO<sub>4</sub>Si<sub>2</sub>: 425.2418 [M<sup>+</sup>], found: 426.2179 [M+1], 427.2158 [M+2], 428.2106 [M+3]; elemental analysis calcd. (%) for C<sub>21</sub>H<sub>39</sub>NO<sub>4</sub>Si<sub>2</sub>: C 59.25, H 9.23, N 3.29; found: C 59.31, H 9.29, N 3.23.

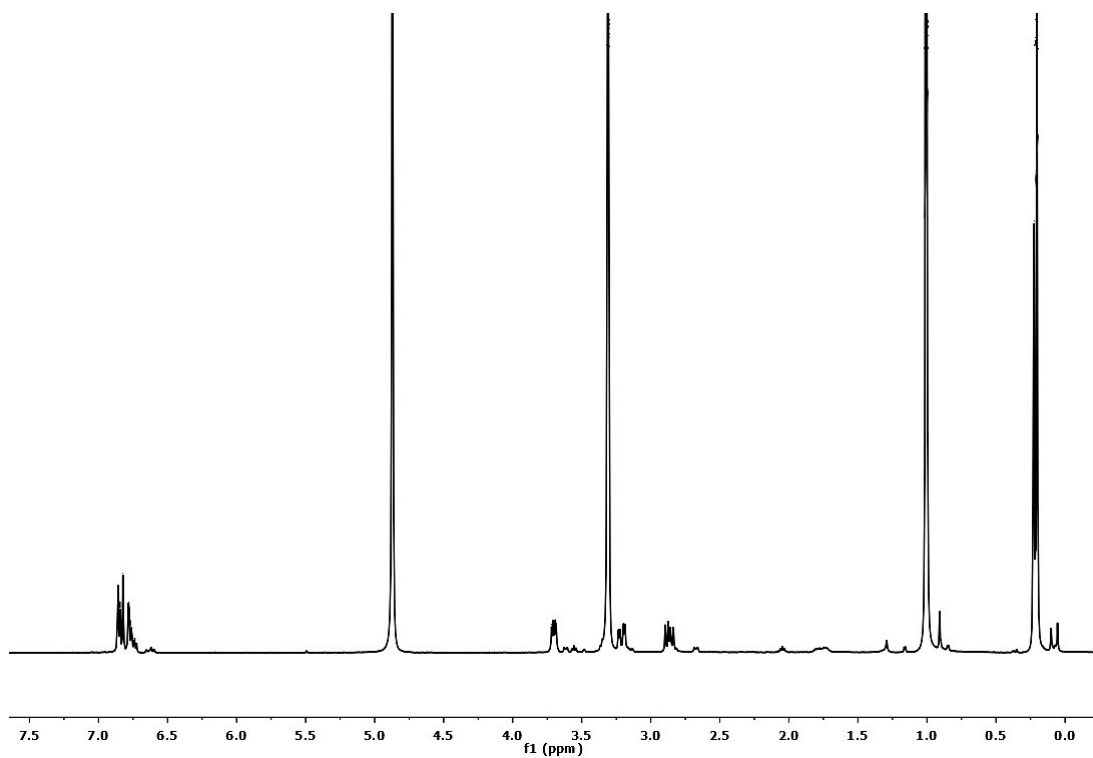

**Fig. S1** NMR spectra of compound **1**

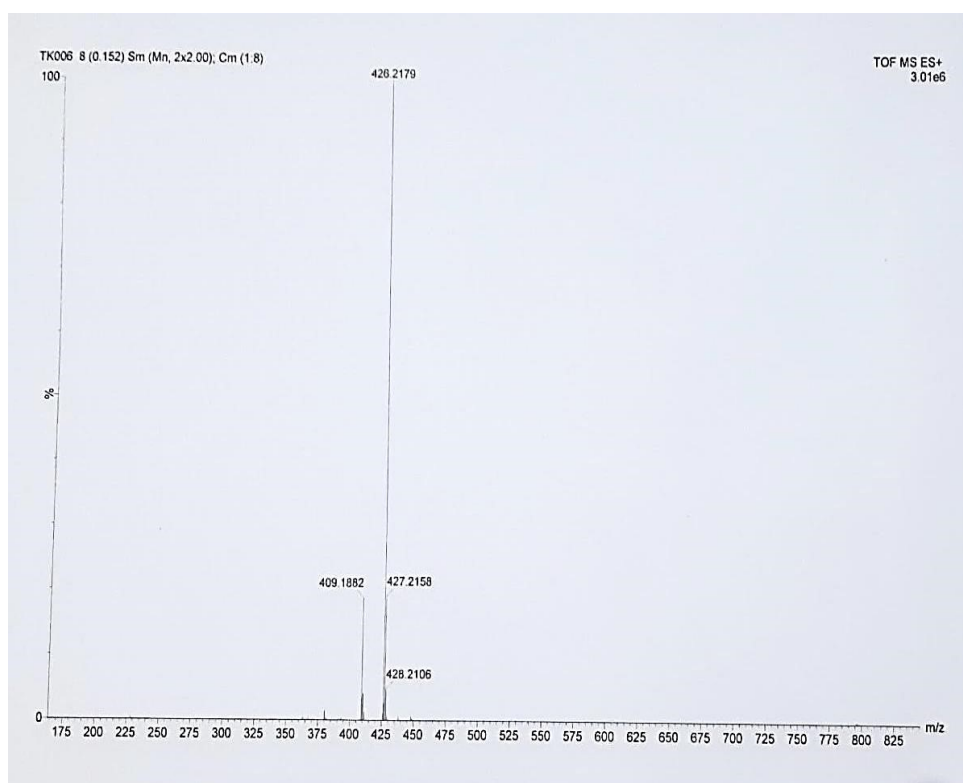

**Fig. S2** Mass spectra of Compound **1**

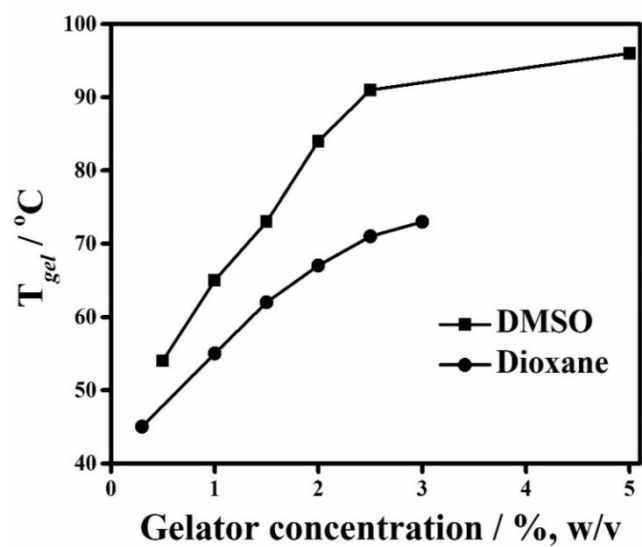

**Fig. S3** Variation of  $T_{gel}$  with gelator concentrations (% w/v) in DMSO and dioxane.

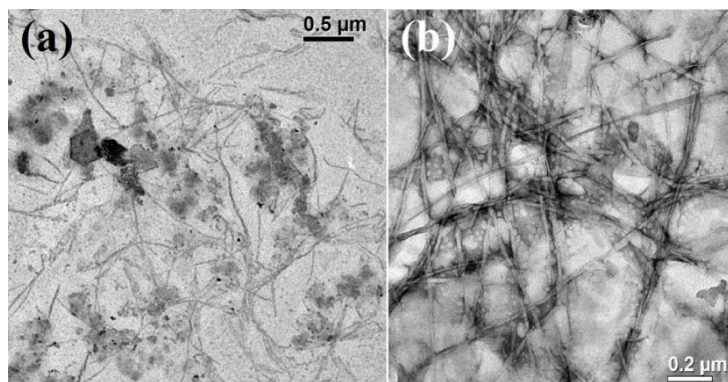

**Fig. S4** TEM images of xerogels of **1** prepared from (a) DMSO, (b) dioxane.

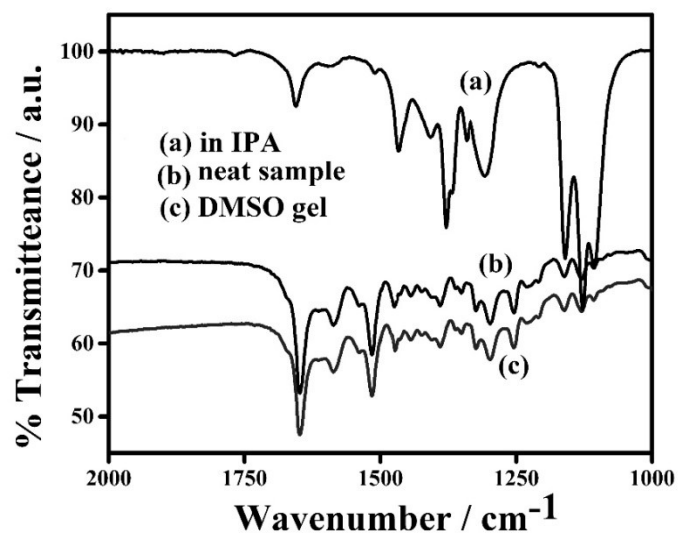

Fig. S5 FTIR spectra of **1** in (a) isopropanol, (b) solid sample, (c) DMSO gel.

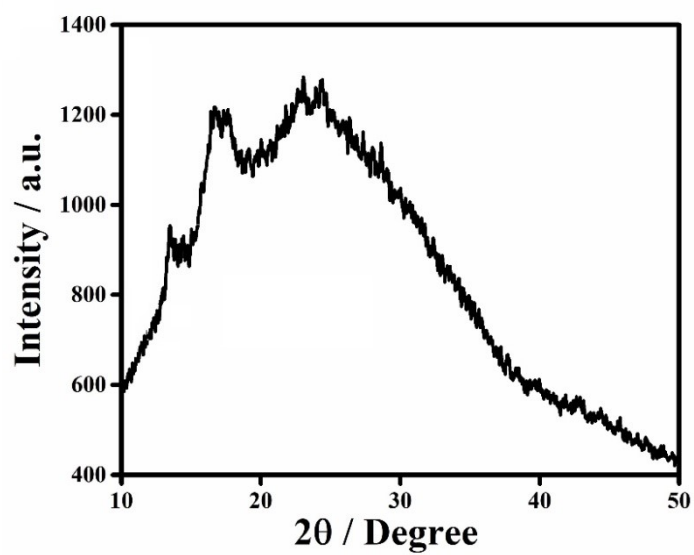

Fig. S6 XRD spectra of dried gel of **1** in DMSO.

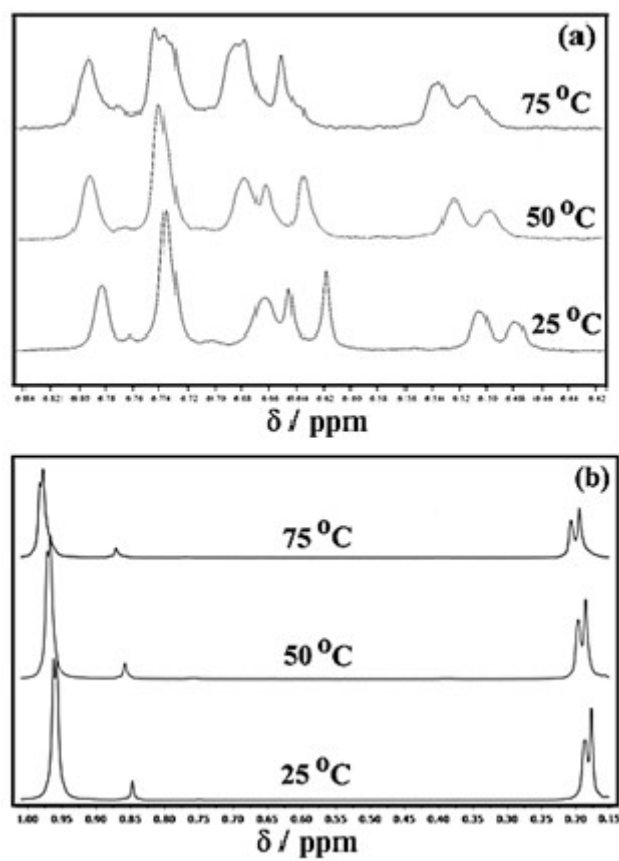

Fig. S7 Temperature dependent proton NMR spectra of gel of 1 in DMSO-d<sub>6</sub>.

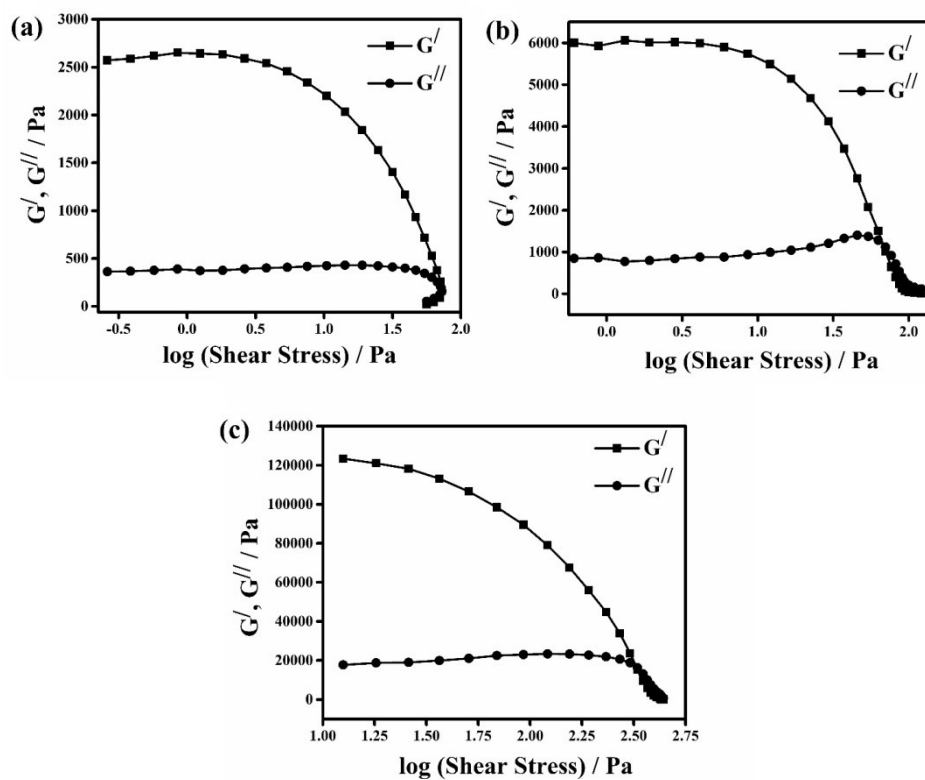

**Fig. S8** Plots of  $G'$  and  $G''$  of **1** in dioxane at gelator concentration (a) 1% w/v and (b) 2% w/v and (c) 5% w/v as a function of oscillatory stress.

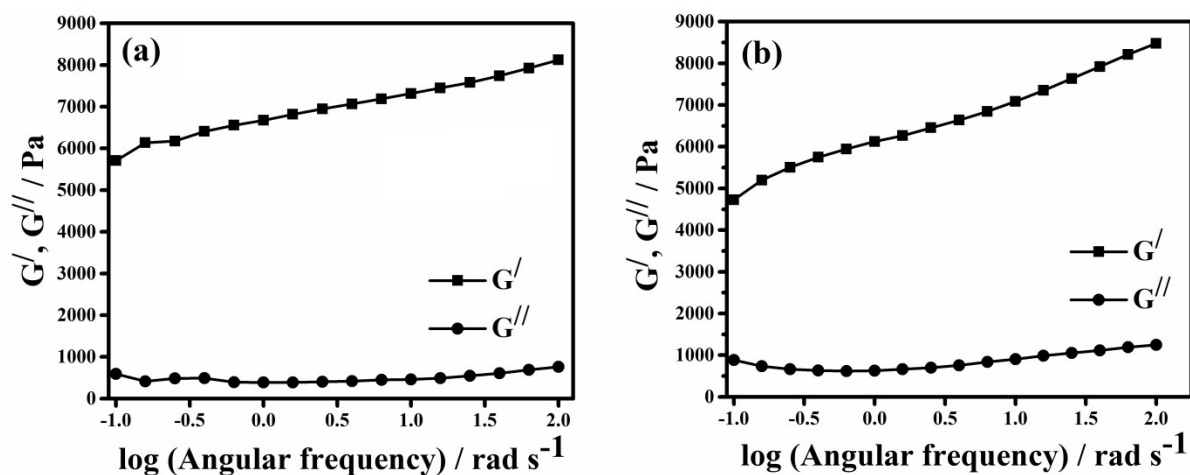

**Fig. S9** Plots of  $G'$  and  $G''$  of **1** (a) in DMSO at gelator concentration 2% w/v and (b) in dioxane at 2% w/v gelator concentration as a function of angular frequency.

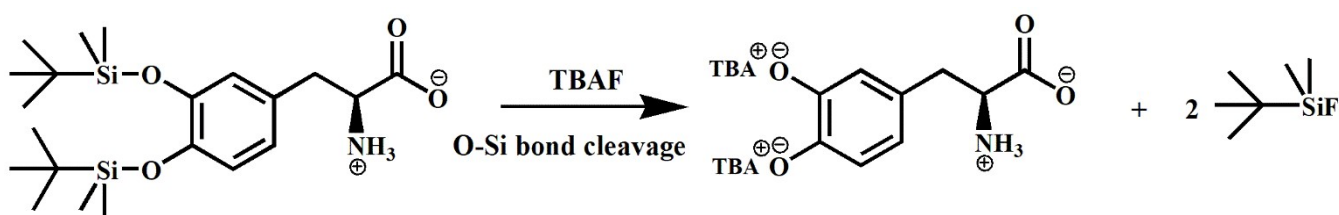

**Fig. S10** Cleavage of Si-O bond to produce non gelating ditertiarybutyl ammonium salt of L-DOPA and tert butyldimethylsilyl fluoride.

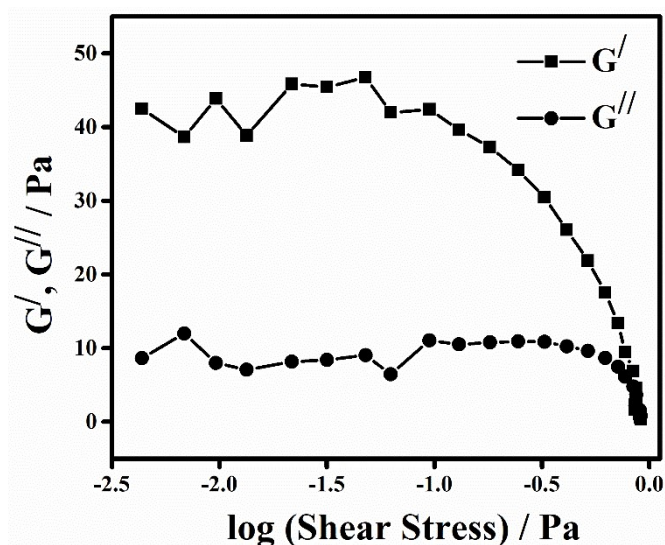

**Fig. S11** Plots of  $G'$  and  $G''$  of **1** at its MGC in DMSO in presence of 0.1 equiv. of TBAF as a function of oscillatory stress.



**Table S1** Fluoride ion concentration (in equiv.) vs. gel degradation time in 30 °C and 45 °C temperature.

| Fluoride equivalent | Degradation time at 30 °C<br>(mean ± SD in second) | Degradation time at 45 °C<br>(mean ± SD in second) |
|---------------------|----------------------------------------------------|----------------------------------------------------|
| 0.05                | 986±4.9                                            | 772±3.8                                            |
| 0.1                 | 922±4.6                                            | 712±3.5                                            |
| 0.2                 | 800±4.0                                            | 596±2.9                                            |
| 0.5                 | 592±2.9                                            | 455±2.2                                            |
| 1.0                 | 504±2.5                                            | 393±1.9                                            |
| 2.0                 | 448±2.2                                            | 352±1.7                                            |
| 3.0                 | 408±2.1                                            | 322±1.6                                            |
| 4.0                 | 380±1.9                                            | 300±1.5                                            |
| 5.0                 | 345±1.7                                            | 272±1.3                                            |

**Table S2** Corresponding best fit equation for fluoride ion concentration vs. gel degradation time in sec. at 30 °C and corresponding R square value.

|                                |                                                   |             |                |
|--------------------------------|---------------------------------------------------|-------------|----------------|
| <b>Equation</b>                | y = Intercept + B1*x^1 + B2*x^2 + B3*x^3 + B4*x^4 |             |                |
| <b>Residual Sum of Squares</b> | 0.0724                                            |             |                |
| <b>Adj. R-Square</b>           | 0.99471                                           |             |                |
|                                |                                                   | Value       | Standard Error |
| <b>B</b>                       | Intercept                                         | 42.1928     | 7.3804         |
|                                | B1                                                | -0.19992    | 0.05055        |
|                                | B2                                                | 3.52937E-4  | 1.2415E-4      |
|                                | B3                                                | -2.7335E-7  | 1.29683E-7     |
|                                | B4                                                | 7.81543E-11 | 4.88294E-11    |

**Table S3** Corresponding best fit equation for fluoride ion concentration vs. gel degradation time in sec. at 45 °C and corresponding R square value.

|                                |                                                   |             |                |
|--------------------------------|---------------------------------------------------|-------------|----------------|
| <b>Equation</b>                | y = Intercept + B1*x^1 + B2*x^2 + B3*x^3 + B4*x^4 |             |                |
| <b>Residual Sum of Squares</b> | 0.09188                                           |             |                |
| <b>Adj. R-Square</b>           | 0.99329                                           |             |                |
|                                |                                                   | Value       | Standard Error |
| <b>B</b>                       | Intercept                                         | 41.96347    | 8.19517        |
|                                | B1                                                | -0.24948    | 0.07159        |
|                                | B2                                                | 5.48717E-4  | 2.24757E-4     |
|                                | B3                                                | -5.25746E-7 | 3.00666E-7     |
|                                | B4                                                | 1.84503E-10 | 1.45124E-10    |
